# Supplementary material for: Effect of Low Nanodiamond Concentrations and Polymerization Techniques on Physical Properties and Antifungal Activities of Denture Base Resin
Source: MDPI journal article supplement (doi:10.3390/polym13244331), 2021-12-10
Supplement: s1 [file s1]

Table S1: Effect of different ND concentration levels on tested properties of conventional and autoclave polymerized PMMA.

| Material | Property           | Groups         | Sum of Square | df | Mean Square   | F-value | P        |
|----------|--------------------|----------------|---------------|----|---------------|---------|----------|
| CP       | Surface Roughness  | Between groups | .008          | 3  | .003          | 7.856   | <0.0001* |
|          |                    | Within groups  | .013          | 36 | .000          |         |          |
|          |                    | Total          | .021          | 39 |               |         |          |
|          | <i>C. albicans</i> | Between groups | 615320000.0   | 3  | 205106666.7   | 14.242  | <0.0001* |
|          |                    | Within groups  | 518460000.0   | 36 | 14401666.7    |         |          |
|          |                    | Total          | 1133780000.0  | 39 |               |         |          |
|          | Contact Angle      | Between groups | 1897.778      | 3  | 632.593       | 288.482 | <0.0001* |
|          |                    | Within groups  | 78.942        | 36 | 2.193         |         |          |
|          |                    | Total          | 1976.720      | 39 |               |         |          |
|          | Translucency       | Between groups | 635.0         | 3  | 211.679       | 384.4   | <0.0001* |
|          |                    | Within groups  | 19.82         | 36 | 0.551         |         |          |
|          |                    | Total          | 654.8         | 39 |               |         |          |
| AP       | Surface Roughness  | Between groups | .000          | 3  | .000          | .291    | 0.831    |
|          |                    | Within groups  | .010          | 36 | .000          |         |          |
|          |                    | Total          | .010          | 39 |               |         |          |
|          | <i>C. albicans</i> | Between groups | 1436698750.0  | 3  | 478899583.333 | 53.890  | <0.0001* |
|          |                    | Within groups  | 319921000.0   | 36 | 8886694.444   |         |          |
|          |                    | Total          | 1756619750.0  | 39 |               |         |          |
|          | Contact Angle      | Between groups | 1500.836      | 3  | 500.279       | 60.402  | <0.0001* |
|          |                    | Within groups  | 298.168       | 36 | 8.282         |         |          |
|          |                    | Total          | 1799.004      | 39 |               |         |          |
|          | Translucency       | Between groups | 625.327       | 3  | 208.442       | 510.225 | <0.0001* |
|          |                    | Within groups  | 14.707        | 36 | 0.409         |         |          |
|          |                    | Total          | 640.034       | 39 |               |         |          |

\*Statistically at 0.05 level of significance

Table S2: Effect of different ND concentration levels on tested properties (after combining both groups)

| Property                 | Groups         | Sum of Square | df | Mean Square   | F       | P        |
|--------------------------|----------------|---------------|----|---------------|---------|----------|
| <b>Surface Roughness</b> | Between groups | .018          | 7  | .003          | 7.999   | <0.0001* |
|                          | Within groups  | .023          | 72 | .000          |         |          |
|                          | Total          | .041          | 79 |               |         |          |
| <b>C. albicans</b>       | Between groups | 2101473875.0  | 7  | 300210553.571 | 25.782  | <0.0001* |
|                          | Within groups  | 838381000.0   | 72 | 11644180.556  |         |          |
|                          | Total          | 2939854875.0  | 79 |               |         |          |
| <b>Contact Angle</b>     | Between groups | 3698.152      | 7  | 528.307       | 100.867 | <0.0001* |
|                          | Within groups  | 377.110       | 72 | 5.238         |         |          |
|                          | Total          | 4075.262      | 79 |               |         |          |
| <b>Translucency</b>      | Between groups | 1260.641      | 7  | 180.092       | 375.507 | <0.0001* |
|                          | Within groups  | 34.531        | 72 | .480          |         |          |
|                          | Total          | 1295.172      | 79 |               |         |          |

\*Statistically at 0.05 level of significance
